# Supplementary material for: Odorant receptor orthologues in conifer‐feeding beetles display conserved responses to ecologically relevant odours
Source: PubMed Central journal article supplement — Mol Ecol. 2022 May 26;31(13):3693–707. doi: 10.1111/mec.16494 (PMC9321952; doi:10.1111/mec.16494), 2022-05-26
Supplement: MEC-31-3693-s001.pdf [file MEC-31-3693-s001.pdf]

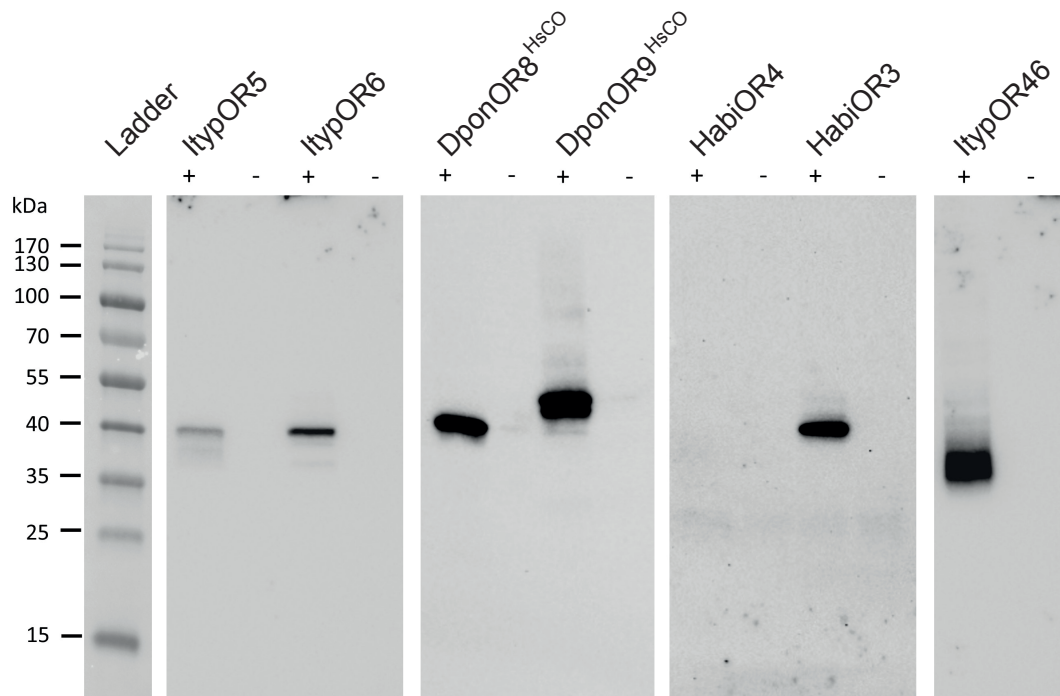

**Supplementary Figure 1.** Results from Western blot analyses of V5-tagged odorant receptors (ORs) from TREx/HEK293 cells. Included are ORs from *Ips typographus* (ItypOR5 and ItypOR6), *Dendroctonus ponderosae* (DponOR8 and DponOR9, expressed from *Homo sapiens* codon-optimized, 'HsCO', genes), and *Hylobius abietis* (HabiOR3 and HabiOR4). Proteins were only detected from cells induced (+) to express the OR genes, and not from non-induced (-) control cells, indicating proper regulation by the repression system. ItypOR46 was included as a positive control (see Yuvaraj et al., 2021).
